# Supplementary material for: Causal associations between dietary antioxidant vitamin intake and lung cancer: A Mendelian randomization study
Source: PubMed Central journal article supplement (PMC9479338; doi:10.3389/fnut.2022.965911), 2022-09-02
Supplement: Data_Sheet_1.pdf [file Data_Sheet_1.pdf]

**Table S1. Single nucleotide polymorphisms (SNPs) associated with diet-derived antioxidants**

| SNP         | Exposure | Effect allele | Other allele | EAF      | <i>P</i> value | SE       | Beta       | R <sup>2</sup> | <i>F</i> -statistic |
|-------------|----------|---------------|--------------|----------|----------------|----------|------------|----------------|---------------------|
| rs12119164  | Retinol  | G             | A            | 0.742193 | 3.40E-06       | 0.006371 | 0.0295741  | 0.00034        | 22                  |
| rs692790    | Retinol  | C             | T            | 0.874331 | 1.40E-06       | 0.008382 | 0.0404149  | 0.00037        | 23                  |
| rs74977546  | Retinol  | A             | G            | 0.052896 | 5.50E-07       | 0.012678 | -0.063514  | 0.00040        | 25                  |
| rs149577802 | Retinol  | T             | C            | 0.015116 | 3.40E-06       | 0.023412 | -0.108795  | 0.00034        | 22                  |
| rs3213829   | Retinol  | G             | T            | 0.546482 | 3.60E-06       | 0.00561  | 0.025976   | 0.00034        | 21                  |
| rs117669768 | Retinol  | A             | G            | 0.038236 | 9.00E-08       | 0.014768 | 0.0789545  | 0.00045        | 29                  |
| rs2126371   | Retinol  | T             | C            | 0.317531 | 1.30E-06       | 0.005977 | -0.0289453 | 0.00037        | 23                  |
| rs117219913 | Retinol  | C             | T            | 0.07834  | 4.40E-06       | 0.010381 | 0.0476864  | 0.00033        | 21                  |
| rs909570    | Retinol  | A             | G            | 0.938952 | 4.40E-06       | 0.011572 | -0.053135  | 0.00033        | 21                  |
| rs1936052   | Carotene | T             | C            | 0.155936 | 2.50E-06       | 0.007668 | -0.0361185 | 0.00034        | 22                  |
| rs6660246   | Carotene | C             | A            | 0.450266 | 1.40E-06       | 0.005531 | -0.0266889 | 0.00036        | 23                  |
| rs12126792  | Carotene | G             | A            | 0.011509 | 1.50E-06       | 0.028005 | -0.134712  | 0.00036        | 23                  |
| rs77547747  | Carotene | C             | T            | 0.056418 | 2.40E-06       | 0.011834 | -0.055803  | 0.00034        | 22                  |
| rs6596473   | Carotene | C             | G            | 0.299056 | 3.70E-06       | 0.005976 | 0.0276423  | 0.00033        | 21                  |
| rs62417408  | Carotene | G             | A            | 0.037772 | 2.40E-06       | 0.014655 | -0.0691153 | 0.00034        | 22                  |
| rs16898247  | Carotene | A             | G            | 0.018968 | 9.00E-08       | 0.020031 | -0.107091  | 0.00044        | 29                  |
| rs13295574  | Carotene | A             | G            | 0.303383 | 3.70E-06       | 0.005982 | -0.0276722 | 0.00033        | 21                  |
| rs3829931   | Carotene | A             | T            | 0.973235 | 3.00E-06       | 0.01779  | 0.0830829  | 0.00034        | 22                  |
| rs17800766  | Carotene | C             | T            | 0.011673 | 1.80E-06       | 0.025496 | -0.121685  | 0.00035        | 23                  |
| rs2998143   | Carotene | G             | A            | 0.603581 | 1.80E-06       | 0.00584  | -0.0278722 | 0.00035        | 23                  |
| rs4771831   | Carotene | A             | G            | 0.351886 | 4.20E-06       | 0.005762 | -0.0265212 | 0.00033        | 21                  |
| rs116995905 | Carotene | T             | C            | 0.009812 | 4.40E-06       | 0.028806 | -0.132301  | 0.00032        | 21                  |
| rs366337    | Carotene | G             | A            | 0.936764 | 1.30E-06       | 0.011222 | 0.0543804  | 0.00036        | 23                  |
| rs117731008 | Carotene | A             | G            | 0.016818 | 4.20E-06       | 0.021228 | 0.0977133  | 0.00033        | 21                  |

|             |           |   |   |          |          |          |            |         |    |
|-------------|-----------|---|---|----------|----------|----------|------------|---------|----|
| rs5760695   | Carotene  | C | T | 0.086598 | 3.20E-06 | 0.010056 | 0.0468481  | 0.00033 | 22 |
| rs7626478   | Vitamin C | A | G | 0.720257 | 4.50E-06 | 0.006101 | 0.0279796  | 0.00032 | 21 |
| rs114598078 | Vitamin C | T | C | 0.042309 | 1.90E-06 | 0.013764 | 0.0655782  | 0.00035 | 23 |
| rs4481190   | Vitamin C | C | A | 0.351041 | 9.60E-08 | 0.005744 | -0.0306375 | 0.00044 | 28 |
| rs74978963  | Vitamin C | T | C | 0.008729 | 1.20E-06 | 0.031021 | 0.150814   | 0.00036 | 24 |
| rs61868302  | Vitamin C | T | C | 0.060676 | 1.40E-06 | 0.011839 | -0.0571013 | 0.00036 | 23 |
| rs17482258  | Vitamin C | T | C | 0.099073 | 3.70E-06 | 0.00926  | 0.042829   | 0.00033 | 21 |
| rs2018201   | Vitamin C | G | T | 0.026551 | 2.50E-06 | 0.017165 | -0.0808079 | 0.00034 | 22 |
| rs9540734   | Vitamin C | A | G | 0.477524 | 2.30E-06 | 0.005485 | -0.0259285 | 0.00034 | 22 |
| rs4238567   | Vitamin C | C | T | 0.522046 | 4.30E-06 | 0.005508 | 0.0253068  | 0.00032 | 21 |
| rs11650824  | Vitamin C | A | T | 0.035071 | 5.60E-07 | 0.015882 | 0.0794787  | 0.00039 | 25 |
| rs1883993   | Vitamin C | A | G | 0.095419 | 1.50E-06 | 0.009353 | 0.044959   | 0.00036 | 23 |
| rs536912    | Vitamin E | A | C | 0.736049 | 9.00E-07 | 0.006201 | 0.0304596  | 0.00037 | 24 |
| rs6033      | Vitamin E | G | A | 0.072493 | 9.90E-07 | 0.010556 | -0.0516563 | 0.00037 | 24 |
| rs2723979   | Vitamin E | G | T | 0.583758 | 1.50E-06 | 0.005527 | -0.0266142 | 0.00036 | 23 |
| rs979218    | Vitamin E | C | A | 0.098036 | 3.10E-06 | 0.009223 | -0.0430325 | 0.00033 | 22 |
| rs79966958  | Vitamin E | T | C | 0.012689 | 2.00E-06 | 0.024505 | -0.116527  | 0.00035 | 23 |
| rs12421920  | Vitamin E | G | A | 0.093546 | 3.70E-06 | 0.009385 | -0.0434479 | 0.00033 | 21 |
| rs111306778 | Vitamin E | A | G | 0.089621 | 5.40E-07 | 0.009572 | -0.0479658 | 0.00039 | 25 |
| rs4903544   | Vitamin E | T | C | 0.30035  | 9.50E-07 | 0.006021 | -0.0295098 | 0.00037 | 24 |
| rs12899673  | Vitamin E | A | G | 0.333079 | 3.80E-06 | 0.005818 | 0.0268951  | 0.00033 | 21 |
| rs35218694  | Vitamin E | G | A | 0.034459 | 1.30E-06 | 0.01531  | -0.0741637 | 0.00036 | 23 |
| rs71385328  | Vitamin E | G | A | 0.011307 | 7.00E-07 | 0.026206 | 0.130015   | 0.00038 | 25 |
| rs12165526  | Vitamin E | A | T | 0.100636 | 1.80E-07 | 0.009178 | 0.0479017  | 0.00042 | 27 |

Note: SNP: Single nucleotide polymorphisms; EAF: effect allele frequency; SE, standard error;  $R^2$  was calculated as follows:  $2 \cdot \beta^2 \cdot \text{EAF} \cdot (1 - \text{EAF}) / (2 \cdot \beta^2 \cdot \text{EAF} \cdot (1 - \text{EAF}) + \text{se}^2 \cdot N \cdot \text{EAF} \cdot (1 - \text{EAF}))$ . The  $F$ -statistic for each SNP was calculated as follows:  $F = (N - 2) \cdot R^2 / (1 - R^2)$ .

**Table S2: instrumental variable trait of dietary antioxidants in PhenoScanner V2.**

| rsID        | Trait                                                    | PMID     | Beta     | <i>P</i> value | Sample size |
|-------------|----------------------------------------------------------|----------|----------|----------------|-------------|
| rs692790    | Immature fraction of reticulocytes                       | 27863252 | 0.03421  | 1.08E-10       | 173480      |
| rs117669768 | Unspecified nephritic syndrome                           | UKBB     | 0.000417 | 9.68E-06       | 337199      |
| rs6596473   | Overall health rating                                    | UKBB     | -0.01014 | 1.63E-07       | 336020      |
| rs6596473   | Height                                                   | UKBB     | 0.009607 | 3.97E-07       | 336474      |
| rs6596473   | Time spent watching television                           | UKBB     | -0.01002 | 1.04E-06       | 319740      |
| rs6596473   | Trunk fat-free mass                                      | UKBB     | 0.007806 | 3.37E-06       | 331030      |
| rs6596473   | Trunk predicted mass                                     | UKBB     | 0.007775 | 3.43E-06       | 330995      |
| rs6596473   | Sitting height                                           | UKBB     | 0.009305 | 6.35E-06       | 336172      |
| rs6596473   | Pulse rate                                               | UKBB     | -0.01221 | 8.78E-06       | 317756      |
| rs17800766  | Treatment with nitrofurantoin                            | UKBB     | 0.001206 | 6.36E-06       | 337159      |
| rs4771831   | Height                                                   | UKBB     | -0.01002 | 3.37E-08       | 336474      |
| rs4771831   | Height                                                   | 25282103 | -0.017   | 2.00E-07       | 247997      |
| rs4771831   | Height                                                   | 23754948 | -0.02528 | 2.03E-07       | 129315      |
| rs4771831   | Comparative height size at age 10                        | UKBB     | -0.00893 | 3.09E-07       | 332021      |
| rs4771831   | Height                                                   | 20881960 | NA       | 9.69E-07       | 129476      |
| rs4771831   | Height                                                   | 20881960 | NA       | 9.69E-07       | 133653      |
| rs116995905 | Home area population density: Scotland - remote rural    | UKBB     | -0.00045 | 1.01E-10       | 333997      |
| rs116995905 | Cause of death: peripheral vascular disease, unspecified | UKBB     | -0.01222 | 2.80E-09       | 7637        |
| rs116995905 | Cause of death: hodgkins disease, unspecified            | UKBB     | -0.01202 | 9.44E-08       | 7637        |
| rs116995905 | Treatment with amisulpride                               | UKBB     | -0.00091 | 1.54E-07       | 337159      |
| rs74978963  | Cause of death: pneumonitis due to food and vomit        | UKBB     | -0.01381 | 9.54E-07       | 7637        |
| rs9540734   | Frequency of unenthusiasm or disinterest in last 2 weeks | UKBB     | 0.007025 | 1.64E-06       | 326730      |
| rs9540734   | Breastfed as a baby                                      | UKBB     | -0.00593 | 2.80E-06       | 255881      |

|            |                                                                        |          |          |          |        |
|------------|------------------------------------------------------------------------|----------|----------|----------|--------|
| rs9540734  | Medication for pain relief, constipation, heartburn: none of the above | UKBB     | -0.00571 | 2.86E-06 | 333581 |
| rs9540734  | Miserableness                                                          | UKBB     | 0.005411 | 7.42E-06 | 331856 |
| rs9540734  | Neuroticism score                                                      | UKBB     | 0.03863  | 9.41E-06 | 274108 |
| rs6033     | Blood protein levels                                                   | 28240269 | -0.8454  | 5.00E-25 | -      |
| rs979218   | Treatment with epaderm ointment                                        | UKBB     | 0.000458 | 5.02E-06 | 337159 |
| rs79966958 | Cause of death: pharynx, unspecified                                   | UKBB     | -0.01028 | 5.96E-06 | 7637   |
| rs12899673 | Time spent watching television                                         | UKBB     | -0.00907 | 5.05E-06 | 319740 |
| rs12899673 | Waist circumference                                                    | UKBB     | -0.01032 | 6.46E-06 | 336639 |
| rs71385328 | Cause of death: cerebrum, except lobes and ventricles                  | UKBB     | -0.01052 | 5.95E-07 | 7637   |
| rs12165526 | Cause of death: cholangitis                                            | UKBB     | 0.005036 | 2.49E-07 | 7637   |

Note: UKBB: UK biobank

**Table S3. Power calculation for the two-sample Mendelian randomization analyses of antioxidant vitamins on lung cancer.**

| Outcomes                  | Exposures | Required ORs (power = 80%) | Estimated ORs |
|---------------------------|-----------|----------------------------|---------------|
| Lung cancer overall       | Retinol   | 1.755                      | 1.844         |
|                           | Carotene  | 1.552                      | 1.263         |
|                           | Vitamin C | 0.563                      | 0.879         |
|                           | Vitamin E | 1.636                      | 1.158         |
| Squamous cell lung cancer | Retinol   | 2.050                      | 2.162         |
|                           | Carotene  | 1.794                      | 1.737         |
|                           | Vitamin C | 0.288                      | 0.606         |
|                           | Vitamin E | 1.902                      | 1.044         |

|                     |           |       |       |
|---------------------|-----------|-------|-------|
| Lung adenocarcinoma | Retinol   | 2.035 | 1.706 |
|                     | Carotene  | 1.782 | 1.510 |
|                     | Vitamin C | 0.304 | 0.707 |
|                     | Vitamin E | 1.889 | 1.681 |

Note: OR: odds ratio

**Table S4. MR-PRESSO outlier-corrected MR analysis for antioxidant vitamin intake and lung cancer.**

| Outcomes                  | Exposures | Outliers    | Raw OR (95% CI)    | <i>P</i> value | Corrected OR (95% CI) | <i>P</i> value | Global test | Distortion Test |
|---------------------------|-----------|-------------|--------------------|----------------|-----------------------|----------------|-------------|-----------------|
| Squamous cell lung cancer | Vitamin C | rs74978963  | 0.606(0.238-1.544) | 0.325          | 1.079(0.460-2.529)    | 0.867          | 0.024       | 0.033           |
| Lung adenocarcinoma       | Vitamin C | rs114598078 | 0.707(0.258-1.933) | 0.518          | 1.182(0.537-2.601)    | 0.690          | 0.029       | 0.106           |

**Table S5. Characteristics of the included meta-analysis of the association between antioxidant vitamin intakes and the lung cancer outcomes.**

| First author                      | Publication years | Publication country | Exposures                | Outcomes    | Risk estimates (RR/HR/OR) and 95% CIs                                                                                          | <i>P</i> value                                                                                  |
|-----------------------------------|-------------------|---------------------|--------------------------|-------------|--------------------------------------------------------------------------------------------------------------------------------|-------------------------------------------------------------------------------------------------|
| Fritz et al <sup>[1]</sup>        | 2011              | Canada              | Vitamin A                | Lung cancer | The risk was not estimated due to heterogeneity in the reporting of results.                                                   | Not mentioned                                                                                   |
| Luo et al <sup>[2]</sup>          | 2014              | China               | Vitamin C                | Lung cancer | RR=0.93, 95%CI=0.88-0.98                                                                                                       | <i>P</i> <0.05                                                                                  |
| Zhu et al <sup>[3]</sup>          | 2017              | China               | Vitamin E                | Lung cancer | RR=0.95, 95% CI =0.91-0.99                                                                                                     | <i>P</i> <0.05                                                                                  |
| Yu et al <sup>[4]</sup>           | 2015              | China               | Vitamin A and β-Carotene | Lung cancer | RR=0.855, 95%CI=0.739-0.989 for vitamin A;<br>RR=0.768, 95%CI=0.675-0.874 for β-Carotene                                       | <i>P</i> =0.005 for vitamin A;<br><i>P</i> =0.002 for β-carotene                                |
| Alkhenizan et al <sup>[5]</sup>   | 2007              | Saudi Arabia        | Vitamin E                | Lung cancer | RR=1.02, 95%CI=0.88-1.19                                                                                                       | <i>P</i> >0.05                                                                                  |
| Cho et al <sup>[6]</sup>          | 2006              | USA                 | Vitamin A, C and E       | Lung cancer | RR=0.96, 95%CI=0.83-1.11 for vitamin A;<br>RR=0.80, 95% CI=0.71-0.91 for vitamin C;<br>RR=0.86, 95% CI=0.76-0.99 for vitamin E | <i>P</i> =0.90 for vitamin A;<br><i>P</i> =0.002 for vitamin C;<br><i>P</i> =0.36 for vitamin E |
| Fu et al <sup>[7]</sup>           | 2021              | China               | Vitamin C                | Lung cancer | RR=0.84, 95%CI=0.73-0.97                                                                                                       | <i>P</i> <0.05                                                                                  |
| Cortés-Jofré et al <sup>[8]</sup> | 2020              | Chile               | Vitamin A, C and E       | Lung cancer | RR=1.09, 95%CI=1.00-1.19 for vitamin A;<br>RR=1.29, 95% CI=0.67-2.49 for vitamin C;<br>RR=1.01, 95% CI=0.90-1.14 for vitamin E | <i>P</i> >0.05 for all vitamins                                                                 |

**Supplemental Figure 1 Flowchart of Mendelian randomization framework in this study.**

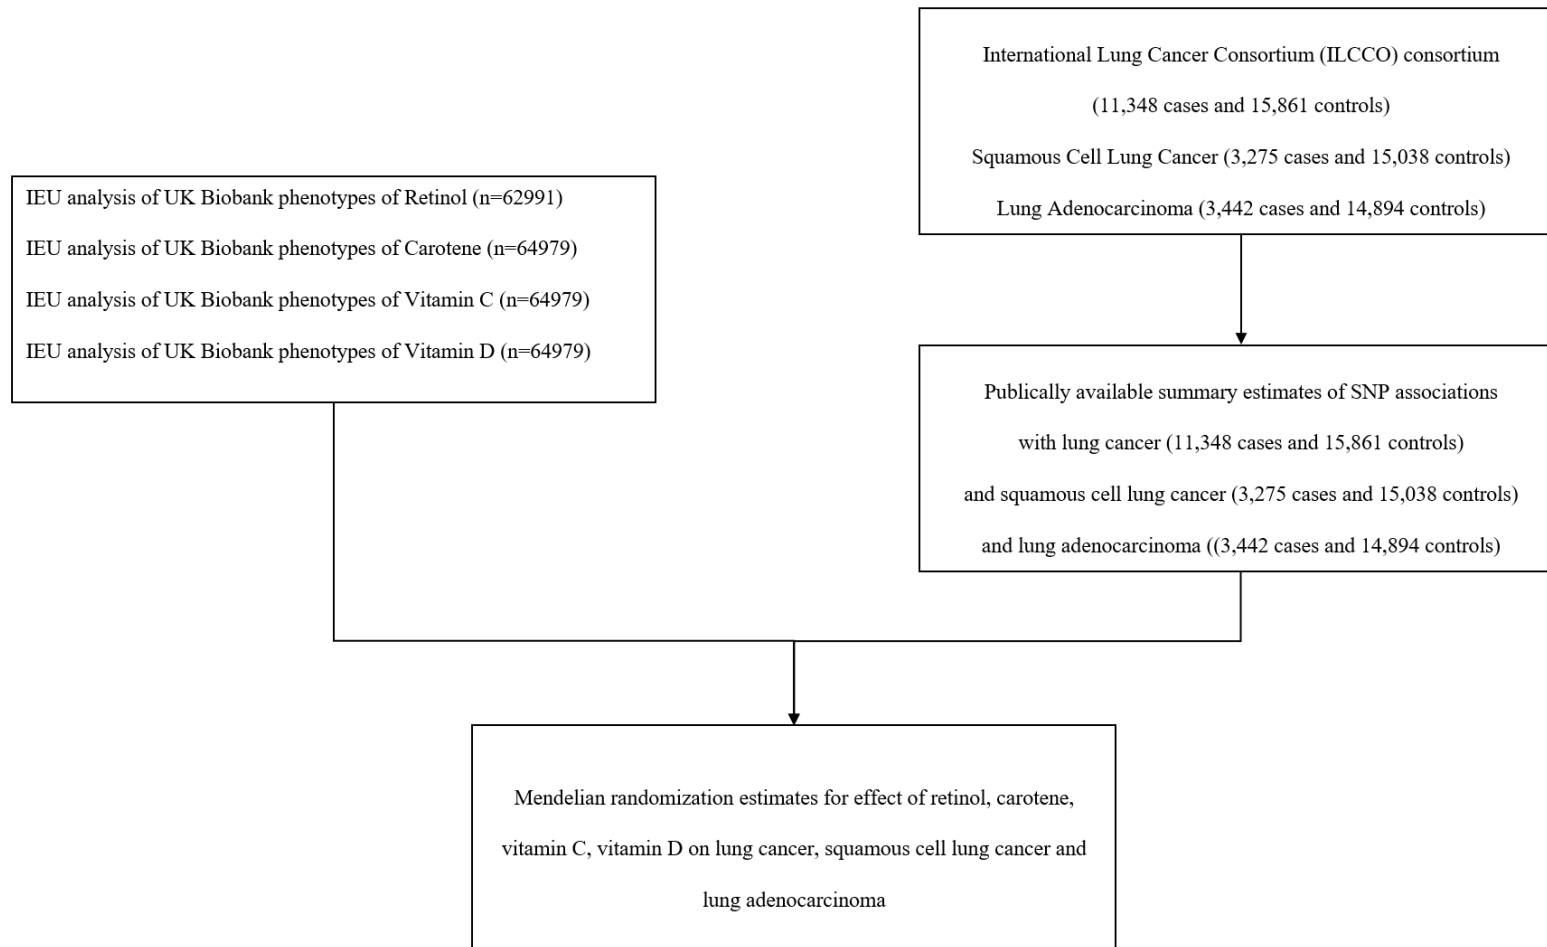

Note: IEU: Integrative Epidemiology Unit

**Supplemental Figure 2 Diagram of Mendelian randomization framework in this study.**

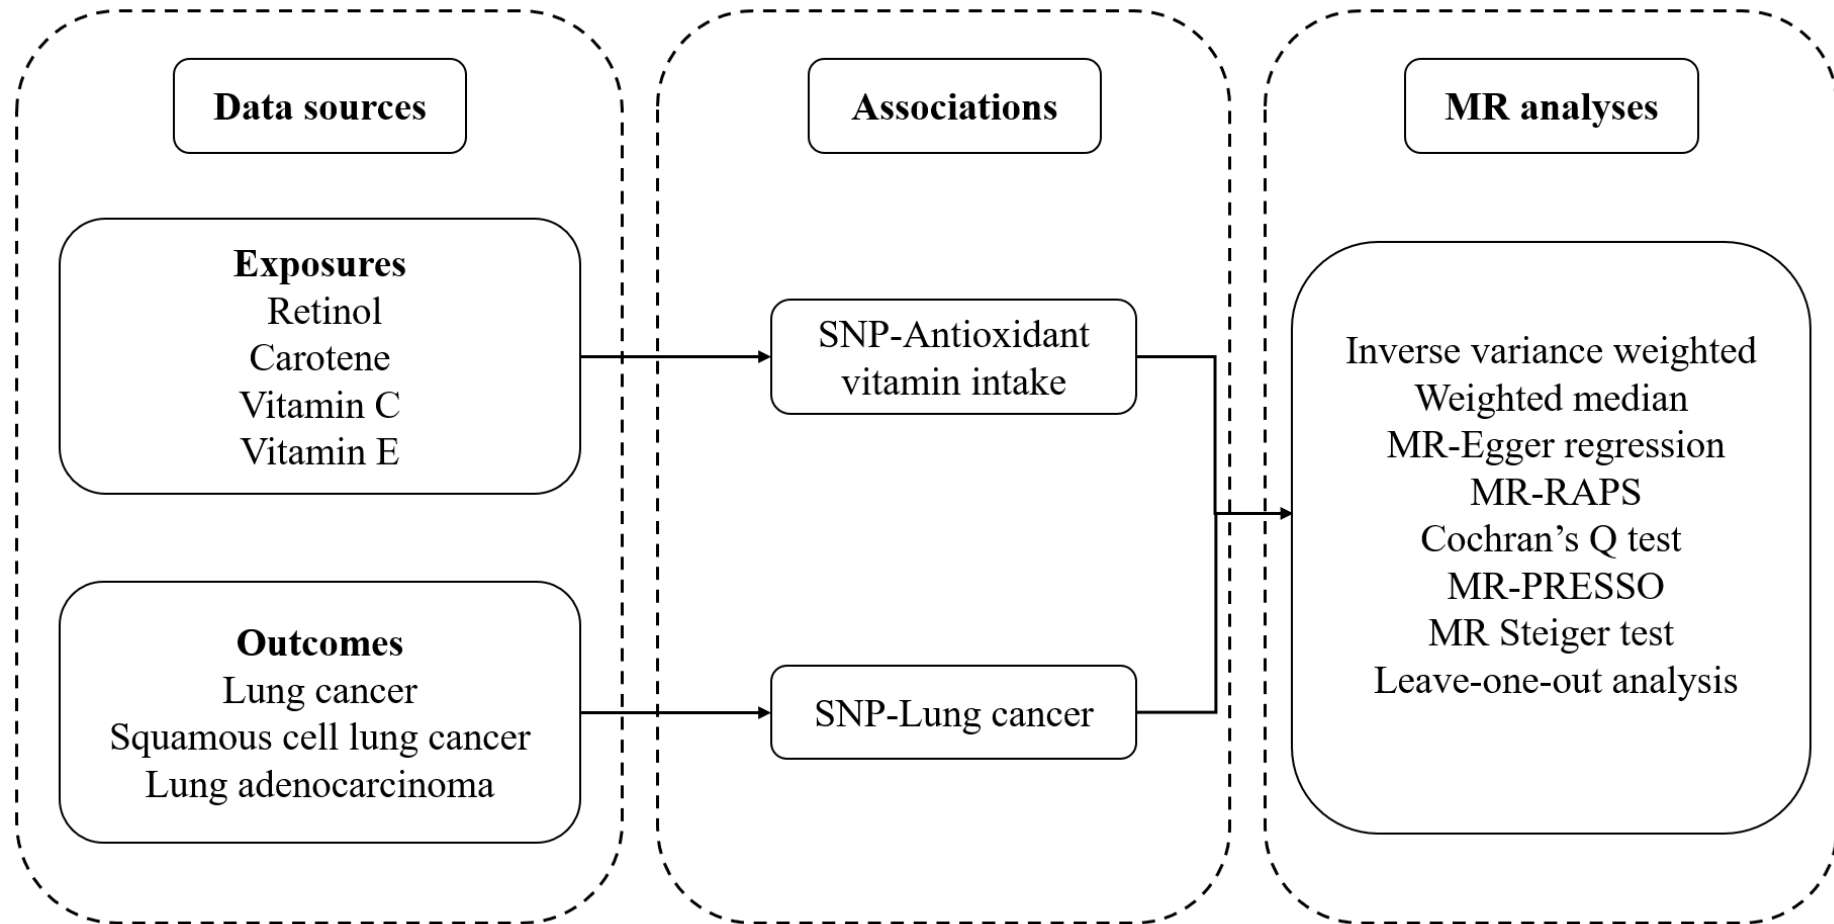



**Supplemental Figure 3 Leave-one-out test for genetically determined antioxidant vitamins and risk of lung cancer (A, B, C, D); squamous cell lung cancer (E, F, G, H); lung adenocarcinoma (I, J, K, L)**

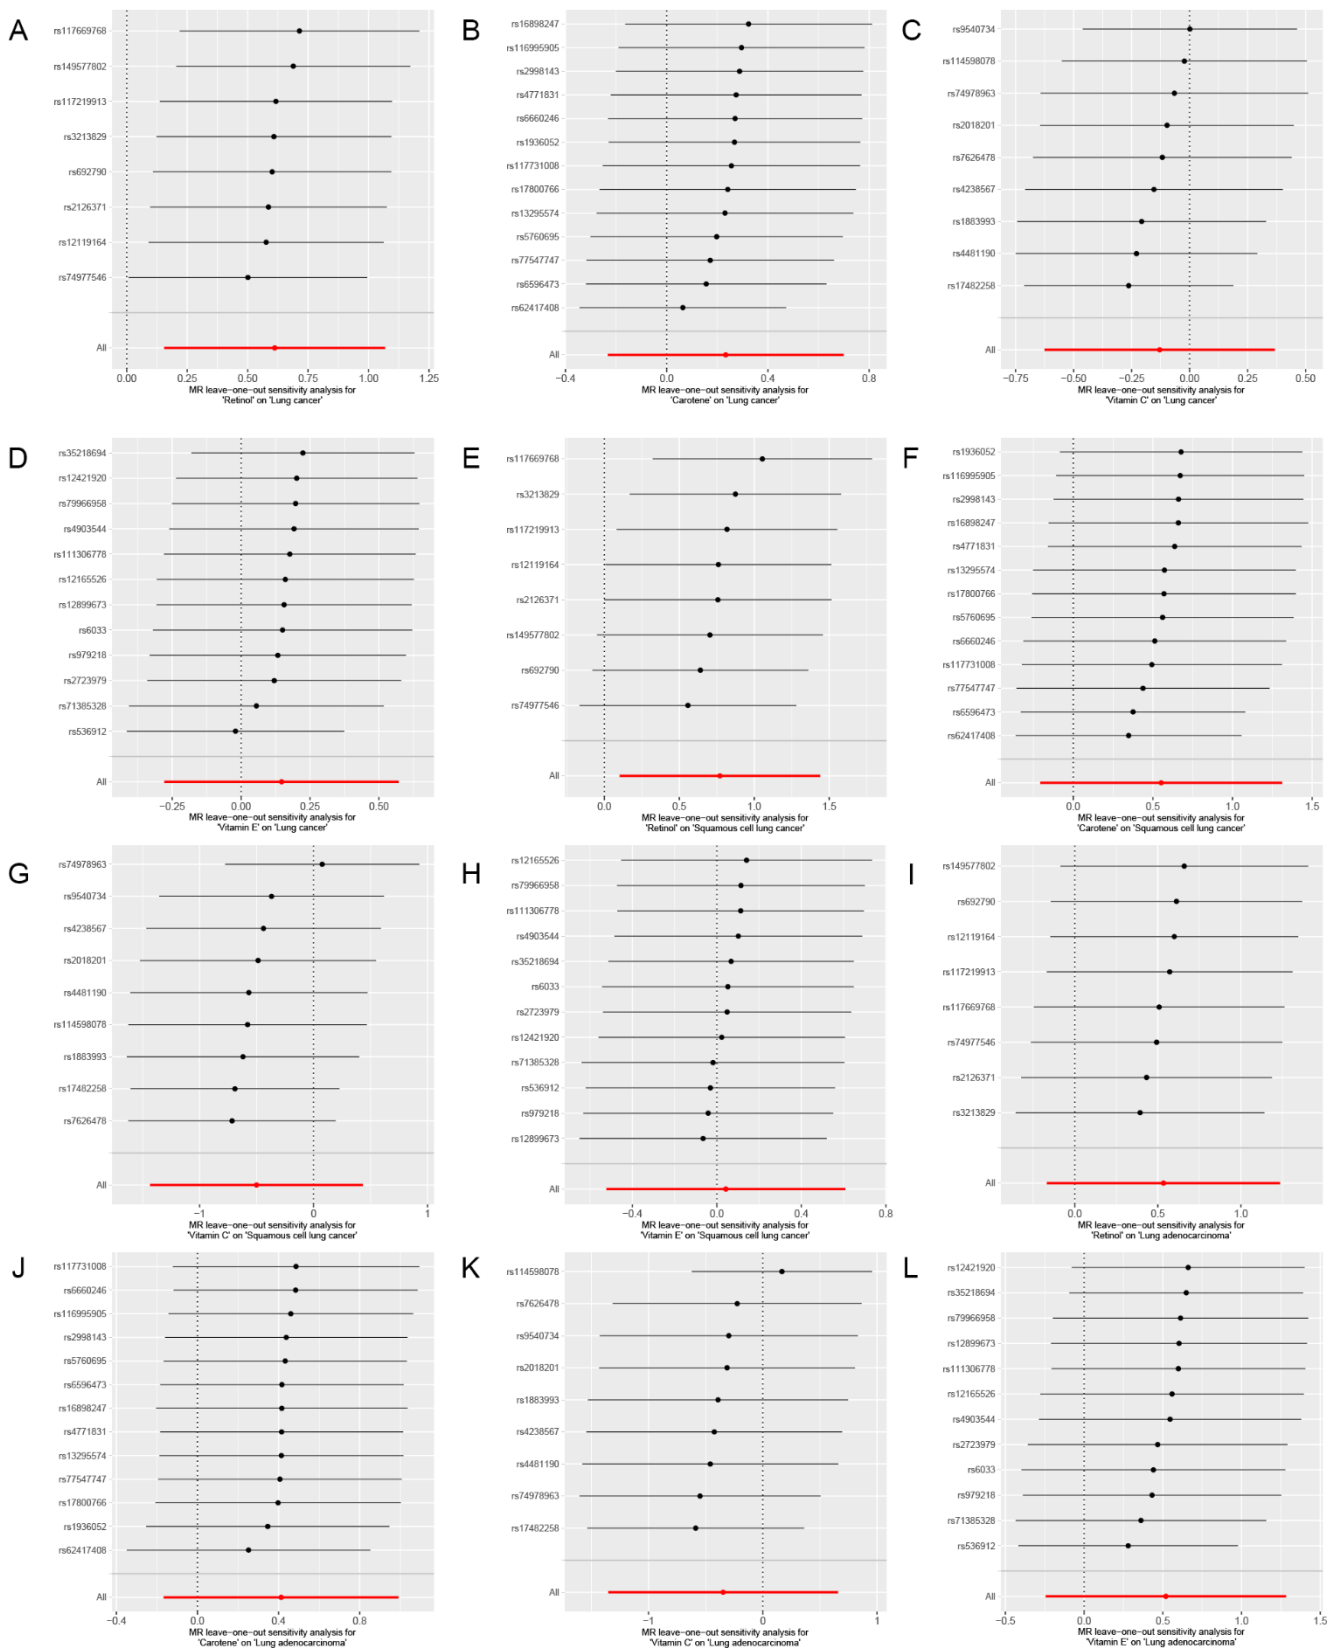

## Reference

- [1] Fritz H, Kennedy D, Fergusson D, et al. Vitamin A and retinoid derivatives for lung cancer: a systematic review and meta analysis[J]. PLoS One, 2011, 6(6): e21107.
- [2] Luo J, Shen L, Zheng D. Association between vitamin C intake and lung cancer: a dose-response meta-analysis[J]. Sci Rep, 2014, 4: 6161.
- [3] Zhu Y J, Bo Y C, Liu X X, et al. Association of dietary vitamin E intake with risk of lung cancer: a dose-response meta-analysis[J]. Asia Pac J Clin Nutr, 2017, 26(2): 271-277.
- [4] Yu N, Su X, Wang Z, et al. Association of Dietary Vitamin A and  $\beta$ -Carotene Intake with the Risk of Lung Cancer: A Meta-Analysis of 19 Publications[J]. Nutrients, 2015, 7(11): 9309-24.
- [5] Alkhenizan A, Hafez K. The role of vitamin E in the prevention of cancer: a meta-analysis of randomized controlled trials[J]. Ann Saudi Med, 2007, 27(6): 409-14.
- [6] Cho E, Hunter D J, Spiegelman D, et al. Intakes of vitamins A, C and E and folate and multivitamins and lung cancer: a pooled analysis of 8 prospective studies[J]. Int J Cancer, 2006, 118(4): 970-8.
- [7] Fu Y, Xu F, Jiang L, et al. Circulating vitamin C concentration and risk of cancers: a Mendelian randomization study[J]. BMC Med, 2021, 19(1): 171.
- [8] Cortés-Jofré M, Rueda J R, Asenjo-Lobos C, et al. Drugs for preventing lung cancer in healthy people[J]. Cochrane Database Syst Rev, 2020, 3(3): Cd002141.
